# Supplementary material
Source: PubMed Central journal article supplement (PMC9562028)
Supplement: NIHMS1820952-supplement-1.pdf [file NIHMS1820952-supplement-1.pdf]

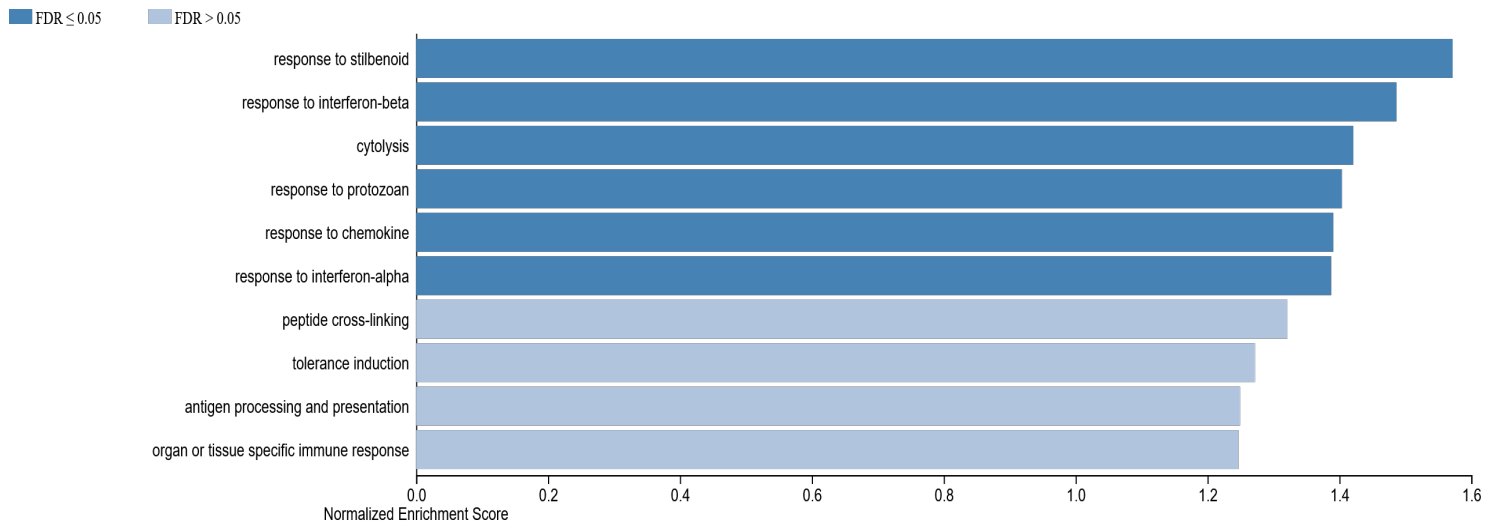

**Supplementary Figure 1 – GO gene set analysis for all gene comparisons between WT and ER $\alpha$  null.** Bar chart revealing the results of GO analysis on all DEGs between WT and ER $\alpha$  null. The list supplied to GSEA includes a total of 24,000 genes, where absolute log<sub>2</sub> fold change between the two strains were used as scores.

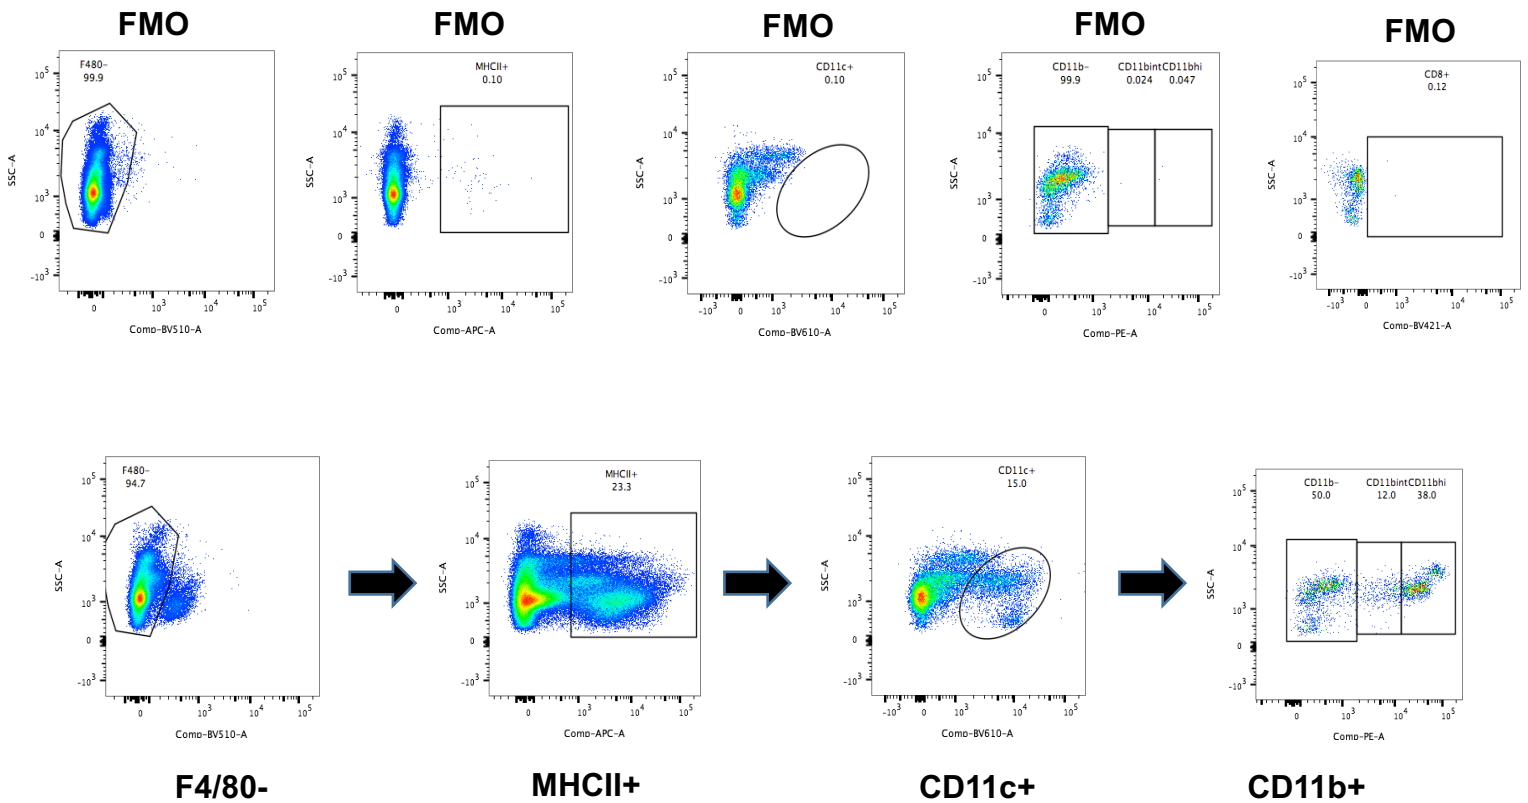

**Supplementary Figure 2 – Flow cytometry analysis gating strategy.** Gating strategy for flow cytometry analysis used in Figure 4. Includes fluorescence minus one (FMO)s for time, singlets, live, Lin-, F4/80-, MHCII+, CD11c<sup>hi</sup>, and CD11b+.
